# Supplementary material for: Humanized Patient-derived Xenograft Models of Disseminated Ovarian Cancer Recapitulate Key Aspects of the Tumor Immune Environment within the Peritoneal Cavity
Source: PubMed Central journal article supplement (PMC9973420; doi:10.1158/2767-9764.crc-22-0300), 2023-02-22
Supplement: crc-22-0300-s01.pdf [file crc-22-0300-s01.pdf]

## Supplementary Data

**Supplementary Table S1. Antibodies used for flow cytometry and IHC analysis.**

| Antibody specificity | Cell type               | Fluorescence | Antibody Clone | Supplier      | RRID       | Use            |
|----------------------|-------------------------|--------------|----------------|---------------|------------|----------------|
| Mouse CD45           | Mouse PBMCs             | FITC         | 30-F11         | BD Bioscience | AB_394610  | Flow cytometry |
| Human CD45           | Human PBMCs             | APC          | HI30           | BD Bioscience | AB_2916374 | Flow cytometry |
| Human CD3            | Human T cells           | BV421        | UCHT1          | BD Bioscience | AB_2744383 | Flow cytometry |
| CD11b                | Human myeloid cells     | PECy7        | ICRF44         | BD Bioscience | AB_396849  | Flow cytometry |
| Human CD19           | Human B cells           | PE           | HIB19          | BD Bioscience | AB_395813  | Flow cytometry |
| Human mitochondria   | All human cells         |              | MAB1273        | Sigma         | NA         | IHC            |
| Human CD68           | Human TAMs              |              | PG-M1          | Agilent Dako  | NA         | IHC            |
| Human CD3            | Human T cells           |              | RBT-CD3        | Bio SB        | NA         | IHC            |
| Human CD4            | Human T cells           |              | SP35           | Sigma         | NA         | IHC            |
| Human CD8            | Human T cells           |              | SP57           | Ventana       | AB_2335985 | IHC            |
| Mouse CD31           | Mouse endothelial cells |              | polyclonal     | Abcam         | ab124432   | IHC            |
