# Supplementary material for: Humanized Patient-derived Xenograft Models of Disseminated Ovarian Cancer Recapitulate Key Aspects of the Tumor Immune Environment within the Peritoneal Cavity
Source: PubMed Central journal article supplement (PMC9973420; doi:10.1158/2767-9764.crc-22-0300), 2023-02-22
Supplement: crc-22-0300-s02.pdf [file crc-22-0300-s02.pdf]

**Supplementary Table S2. Patient characteristics for the three PDX models**

| <b>Patient ID#</b> | <b>Diagnosis</b> | <b>Age at diagnosis</b> | <b>Platinum sensitivity</b> | <b>BRCA mutation status</b> | <b>Survival time after surgery</b>      |
|--------------------|------------------|-------------------------|-----------------------------|-----------------------------|-----------------------------------------|
| <b>PDX3</b>        | HGSOC Stage 3c   | 49                      | Sensitive                   | wildtype                    | survived 6.5 years, DOD                 |
| <b>PDX9</b>        | HGSOC Stage 3B   | 56                      | Resistant                   | wildtype                    | survived 18 months, DOD                 |
| <b>PDX18</b>       | HGSOC Stage 3C   | 60                      | Sensitive                   | wildtype                    | recurrence at 1 year, lost to follow up |

\* *DOD: dead of disease*
