# Supplementary material for: Humanized Patient-derived Xenograft Models of Disseminated Ovarian Cancer Recapitulate Key Aspects of the Tumor Immune Environment within the Peritoneal Cavity
Source: PubMed Central journal article supplement (PMC9973420; doi:10.1158/2767-9764.crc-22-0300), 2023-02-22
Supplement: crc-22-0300-s03.pdf [file crc-22-0300-s03.pdf]

**Supplementary Table S3. Genes with lower expression in non-humanized PDX ovarian cancer samples compared to patient ovarian cancer samples**

| Gene Symbol | Immune related | Role                                                       |
|-------------|----------------|------------------------------------------------------------|
| THBS1       | Yes            | Macrophage polarization/activation and immune infiltration |
| COL1A1      | Yes            | Immune infiltration                                        |
| COL3A1      | Yes            | Immune infiltration                                        |
| COL1A2      | Yes            | Immune infiltration                                        |
| MALAT1      | Yes            | Macrophage polarization/activation                         |
| NEAT1       | Yes            | Macrophage polarization/activation                         |
| ITGA5       | Yes            | Immune infiltration                                        |
| CDKN1A      | Yes            | Macrophage polarization/activation                         |
| LOXL2       | No             |                                                            |
| ALDH1A3     | No             |                                                            |
| PTGIS       | Yes            | Macrophage polarization/activation                         |
| LOXL2       | No             |                                                            |
| DAB2        | No             |                                                            |
| SERPINE1    | Yes            | NK cell marker                                             |
| LAMA4       | No             |                                                            |
| ADAMTS2     | Yes            | Expressed in active macrophages                            |
| THBS2       | Yes            | Immune infiltration                                        |
| COL5A2      | Yes            | Immune infiltration                                        |
| ACTA2       | No             |                                                            |
| TGFBI       | No             |                                                            |
| CCDC80      | No             |                                                            |
| ITGAX       | Yes            | Macrophage/dendritic cell marker                           |
| CSF1R       | Yes            | Macrophage marker                                          |
| CD14        | Yes            | Macrophage marker                                          |
| CYP27A1     | No             |                                                            |
| IL10RA      | Yes            | Macrophage marker                                          |
| LSP1        | No             |                                                            |
| CD68        | Yes            | Macrophage marker                                          |
| SPP1        | No             |                                                            |
| DPP4        | No             |                                                            |
| LRRN4       | No             |                                                            |
| CA12        | No             |                                                            |
| HLA-DRB5    | Yes            | Macrophage marker                                          |
| LYZ         | No             |                                                            |
| MIAT        | No             |                                                            |
| PDGFRA      | No             |                                                            |
| SVEP1       | No             |                                                            |
| ABI38P      | No             |                                                            |
| PLAC4       | No             |                                                            |
| SYNPO2      | No             |                                                            |
| HMCN1       | No             |                                                            |
| MMP11       | No             |                                                            |
| C1QC        | Yes            | Serum complement system                                    |
| C1QA        | Yes            | Serum complement system                                    |
| VSIG4       | No             |                                                            |
| C1QB        | Yes            | Serum complement system                                    |
| CD163       | Yes            | Macrophage marker                                          |
| LAPTM5      | No             |                                                            |
| CYBB        | Yes            | Phagocytosis                                               |
| STAB1       | No             |                                                            |
| PTPRC       | No             |                                                            |
| EMILIN1     | No             |                                                            |
| SLCO2B1     | No             |                                                            |
| ZEB2        | No             |                                                            |
| VCAM1       | Yes            | Cytokine-activated endothelium                             |
| LUM         | No             |                                                            |
| DCN         | No             |                                                            |
| MEG3        | No             |                                                            |
| COL6A3      | Yes            | Immune infiltration                                        |
| CDH11       | No             |                                                            |
| POSTN       | No             |                                                            |
| MARCO       | Yes            | Macrophage marker                                          |
| SERPINB2    | Yes            | Expressed in active macrophages                            |

*Purple indicates immune related genes.*
