# Supplementary material for: Humanized Patient-derived Xenograft Models of Disseminated Ovarian Cancer Recapitulate Key Aspects of the Tumor Immune Environment within the Peritoneal Cavity
Source: PubMed Central journal article supplement (PMC9973420; doi:10.1158/2767-9764.crc-22-0300), 2023-02-22
Supplement: crc-22-0300-s06.pdf [file crc-22-0300-s06.pdf]

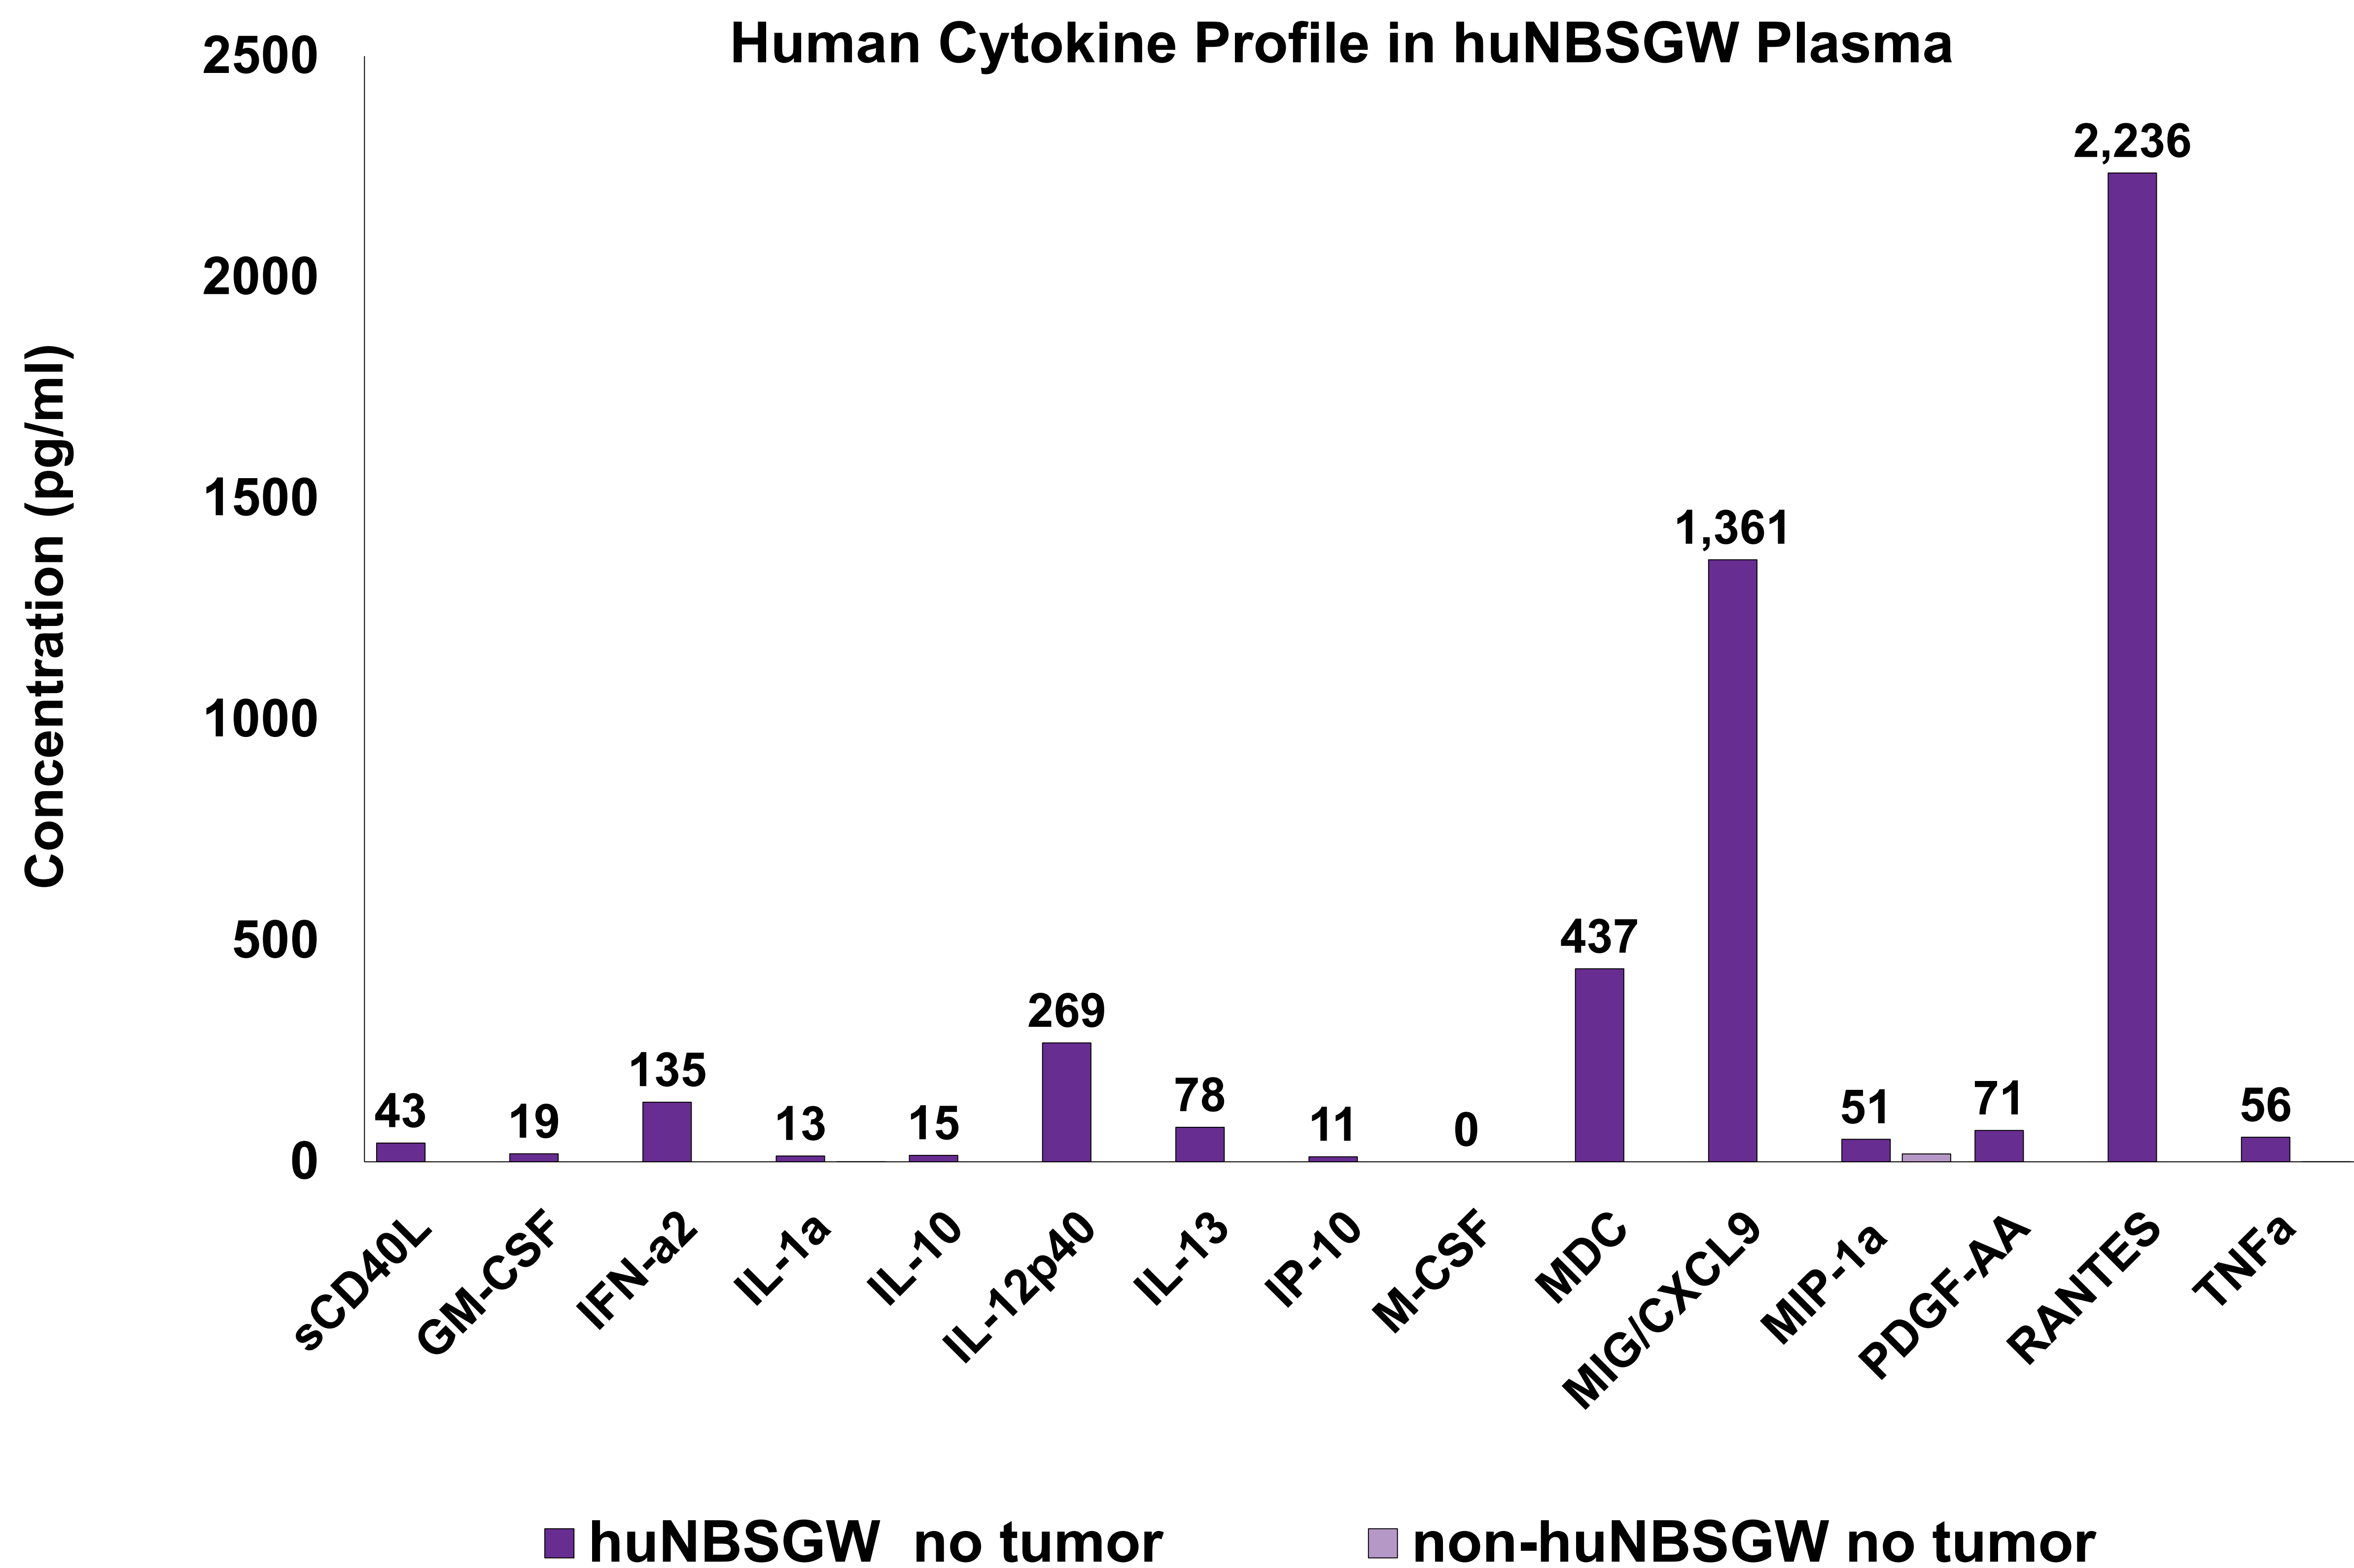

**Fig. S3 Levels of human factors in the plasma of a non-tumor bearing humanized NBSGW and a non-humanized non-tumor bearing NBSGW control. Levels were measured on a 48-plex human cytokine/chemokine array.**
